# Supplementary material for: Improved photocatalytic activity in a surfactant-assisted synthesized Ti-containing MOF photocatalyst under blue LED irradiation
Source: Royal Society of Chemistry journal article supplement (doi:10.1039/c4nj01536c), 2014-11-20

## New Journal of Chemistry

### Supporting information

#### Improved Photocatalytic Activity in Surfactant-assisted Synthesized Ti-containing MOF Photocatalyst under Blue LED Irradiation

Sedigheh Abedi and Ali Morsali\*

Department of Chemistry, Faculty of Sciences, Tarbiat Modares University, PO Box 14115-4838, Tehran, Iran

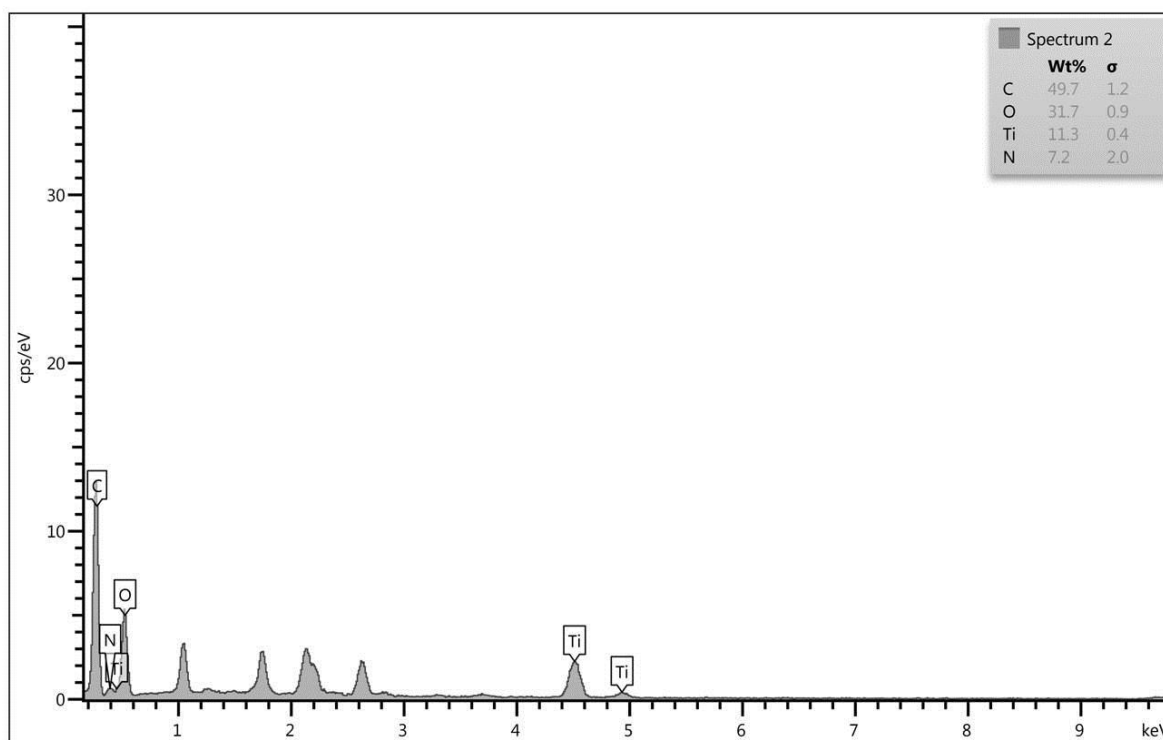

**Fig. S1.** EDS of the unwashed catalyst, SMIL-NH<sub>2</sub> after deoximation reaction

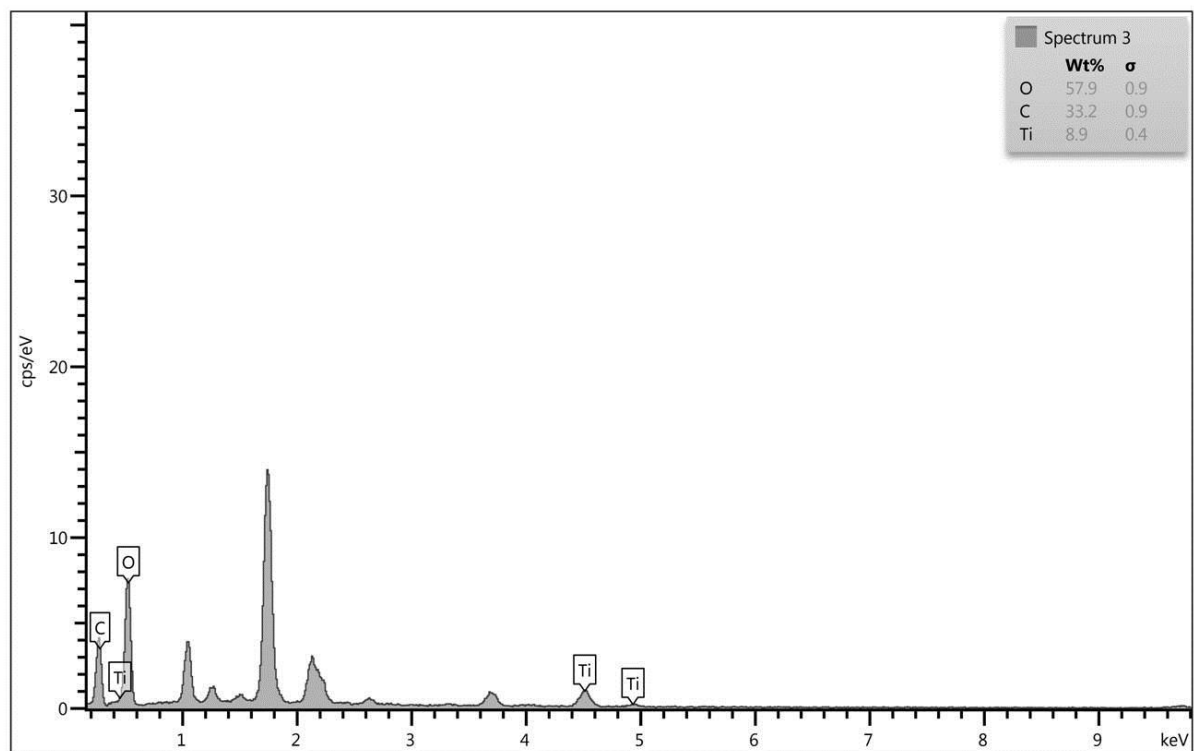

**Fig. S2.** EDS of the washed catalyst, SMIL-NH<sub>2</sub>R after deoximation reaction

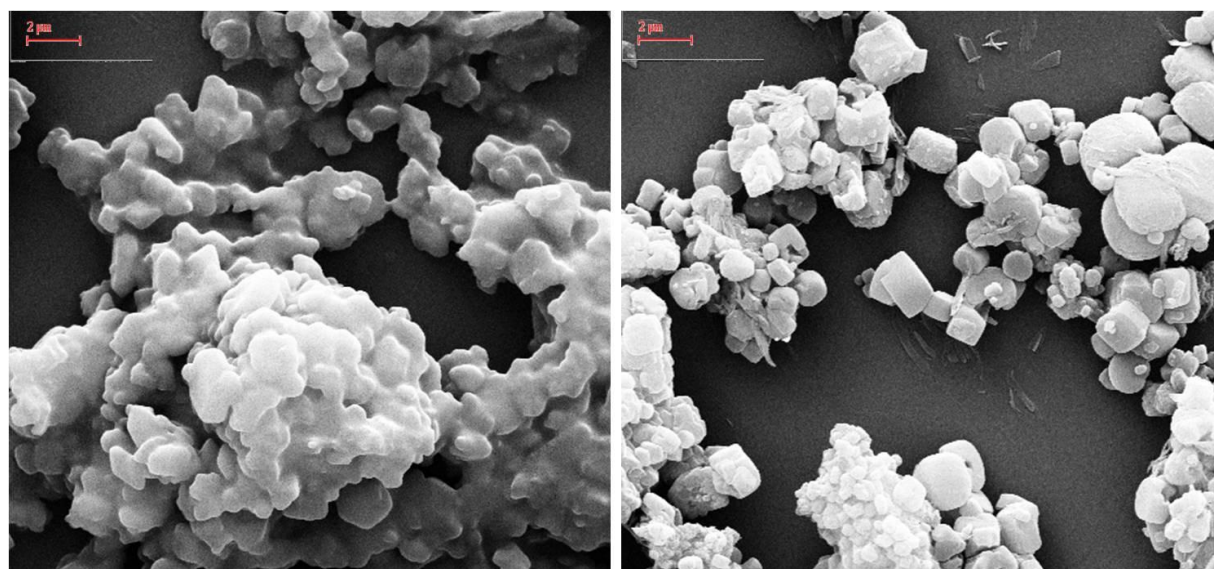

**Fig. S3.** SEM images of the used SMIL-NH<sub>2</sub>R before (left) and after washing the catalyst (right)

The  $^1\text{H}$ -NMR (400 MHz,  $\text{CDCl}_3$ -*d*1),  $^{13}\text{C}$ -NMR (100 MHz,  $\text{CDCl}_3$ -*d*1) spectra for the oximes are as follows:

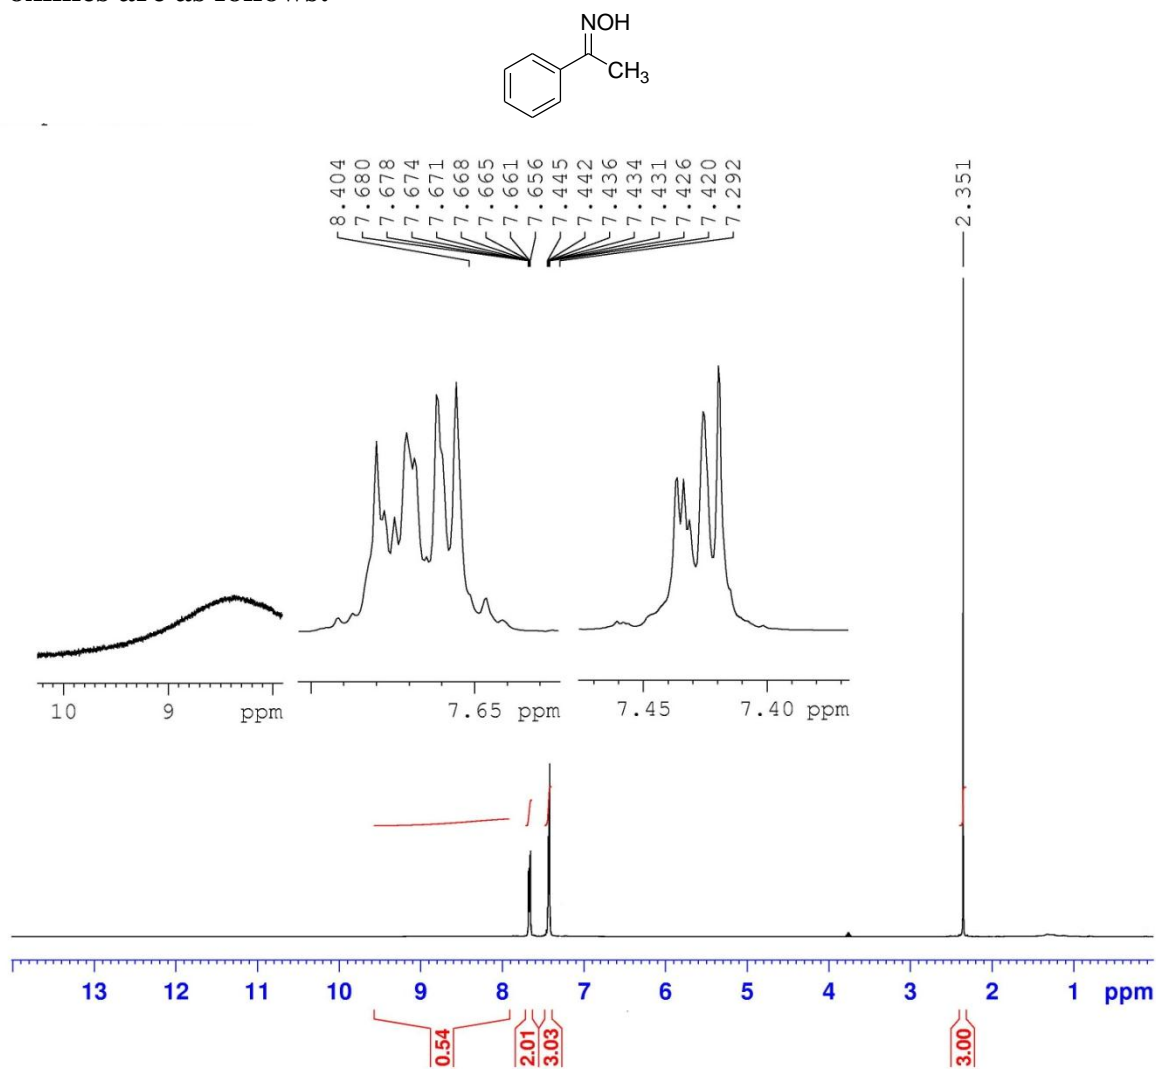

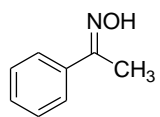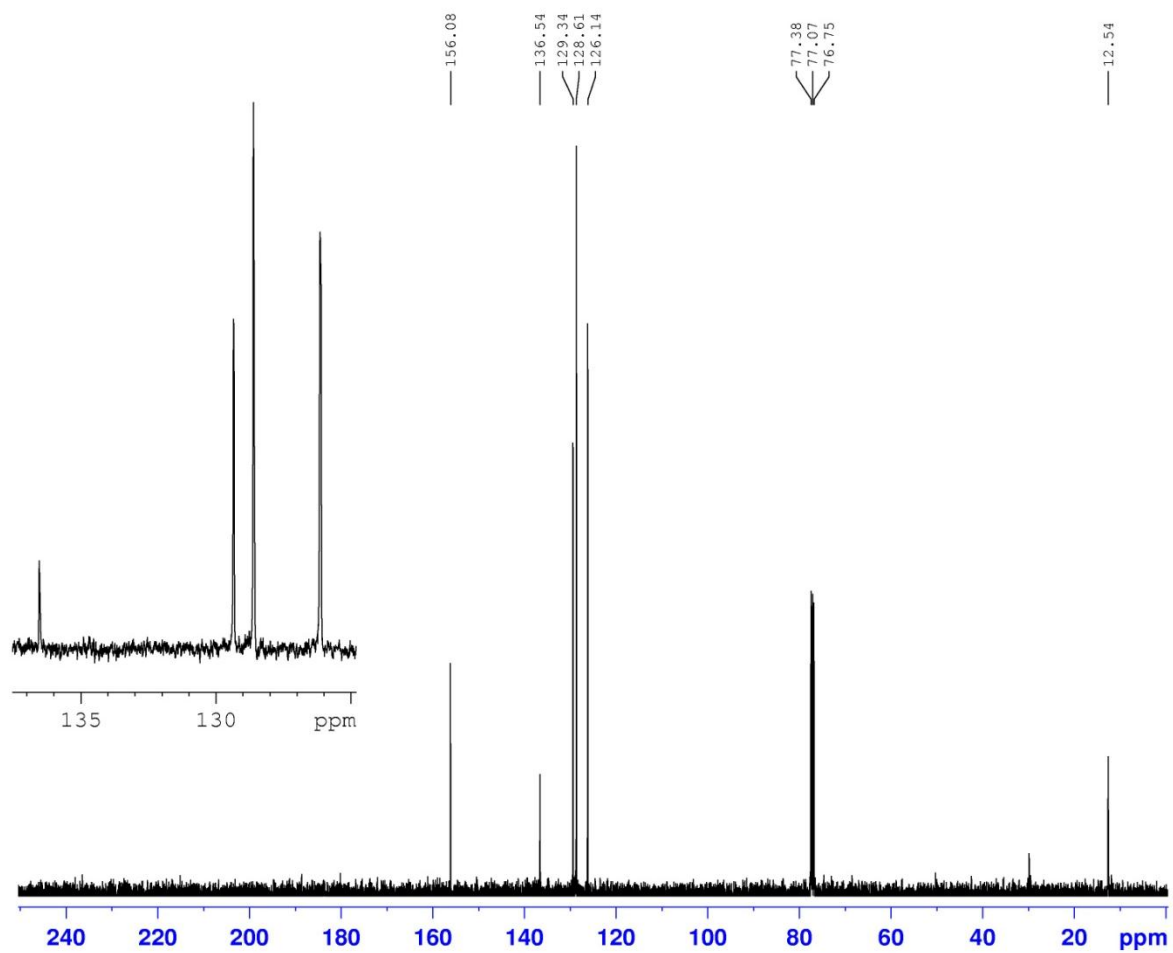

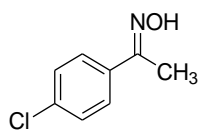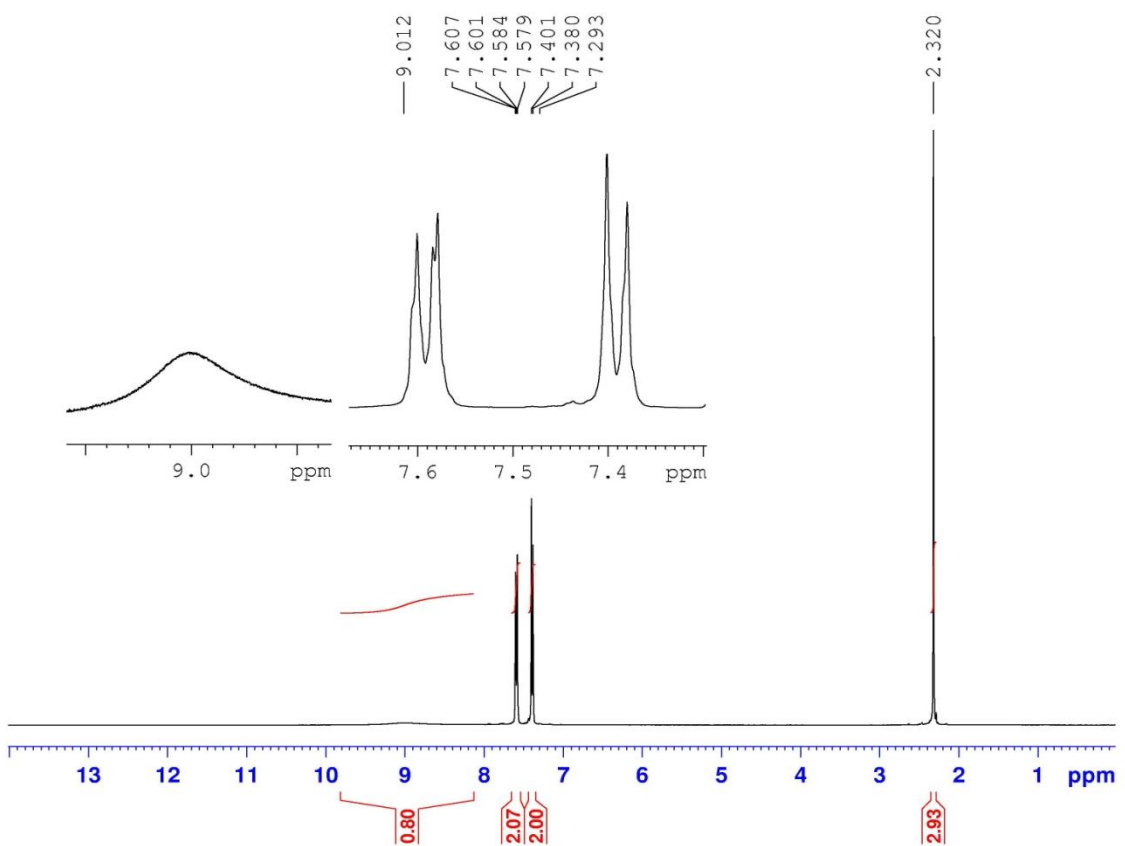

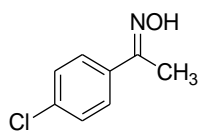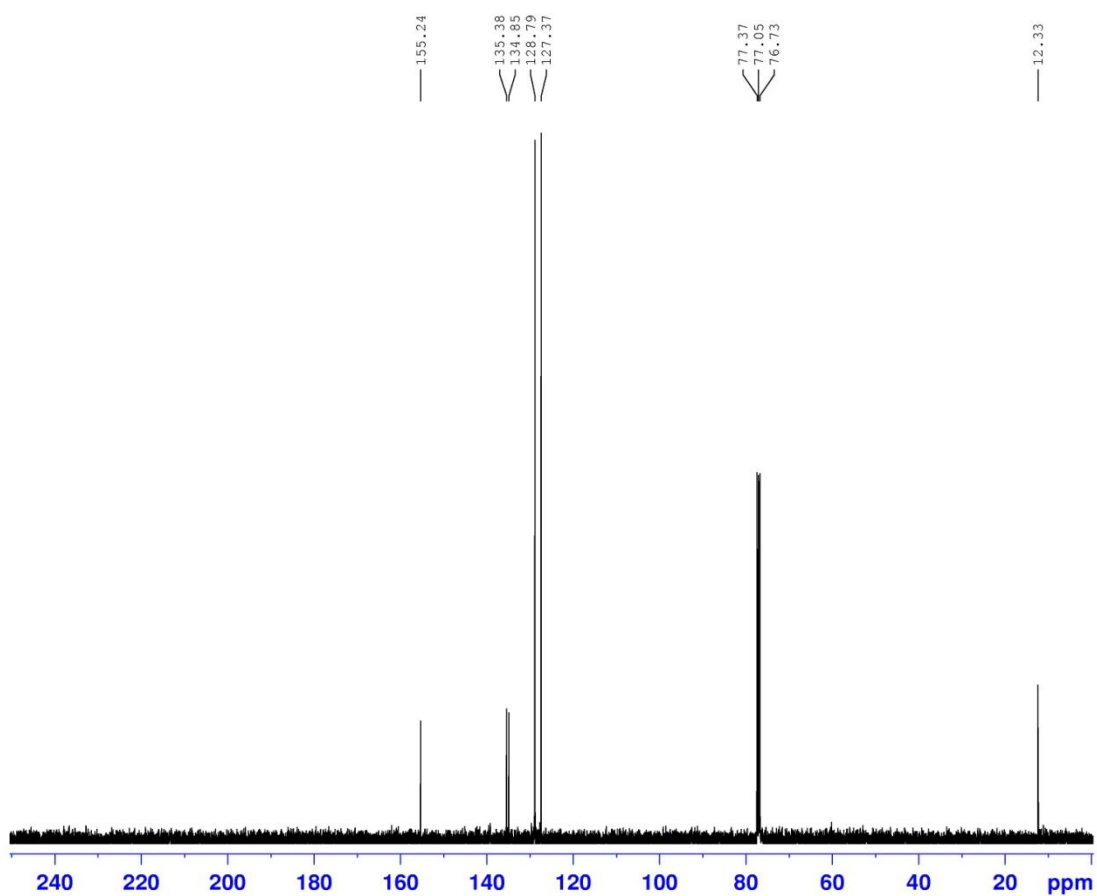

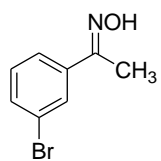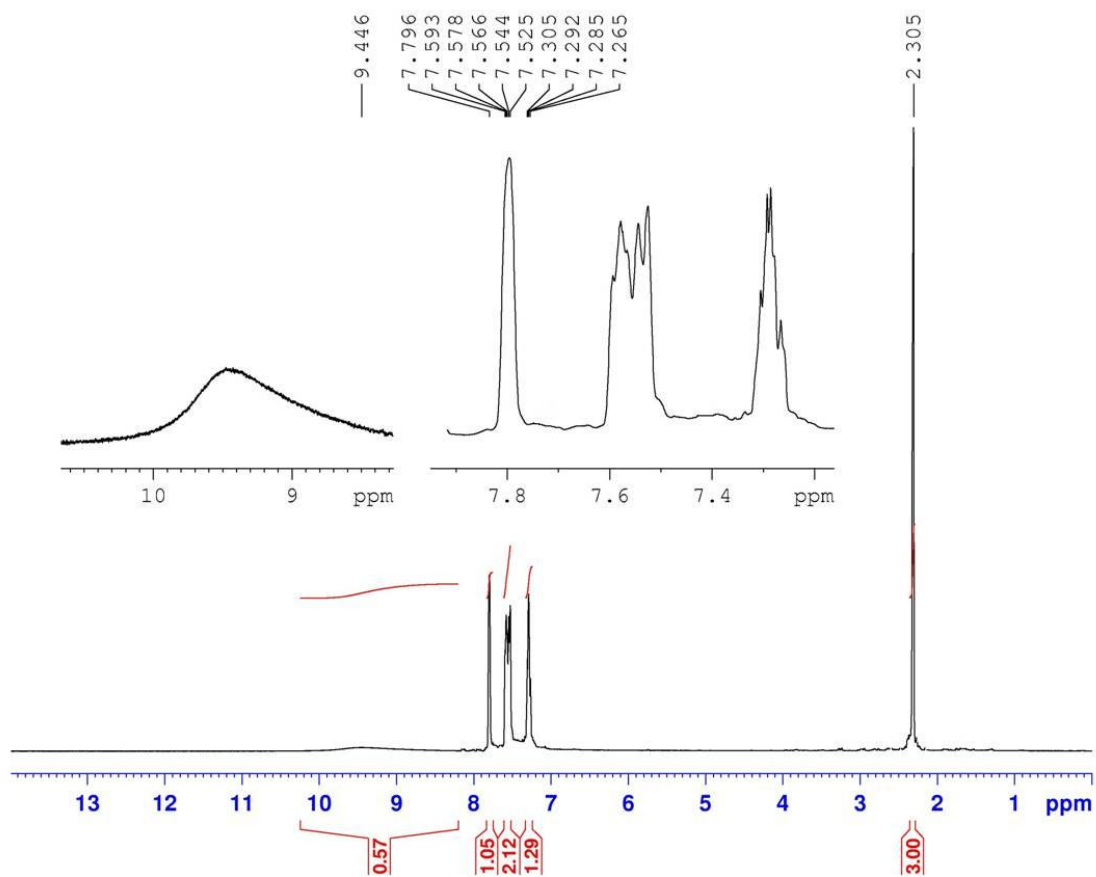

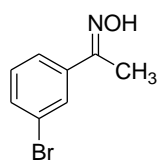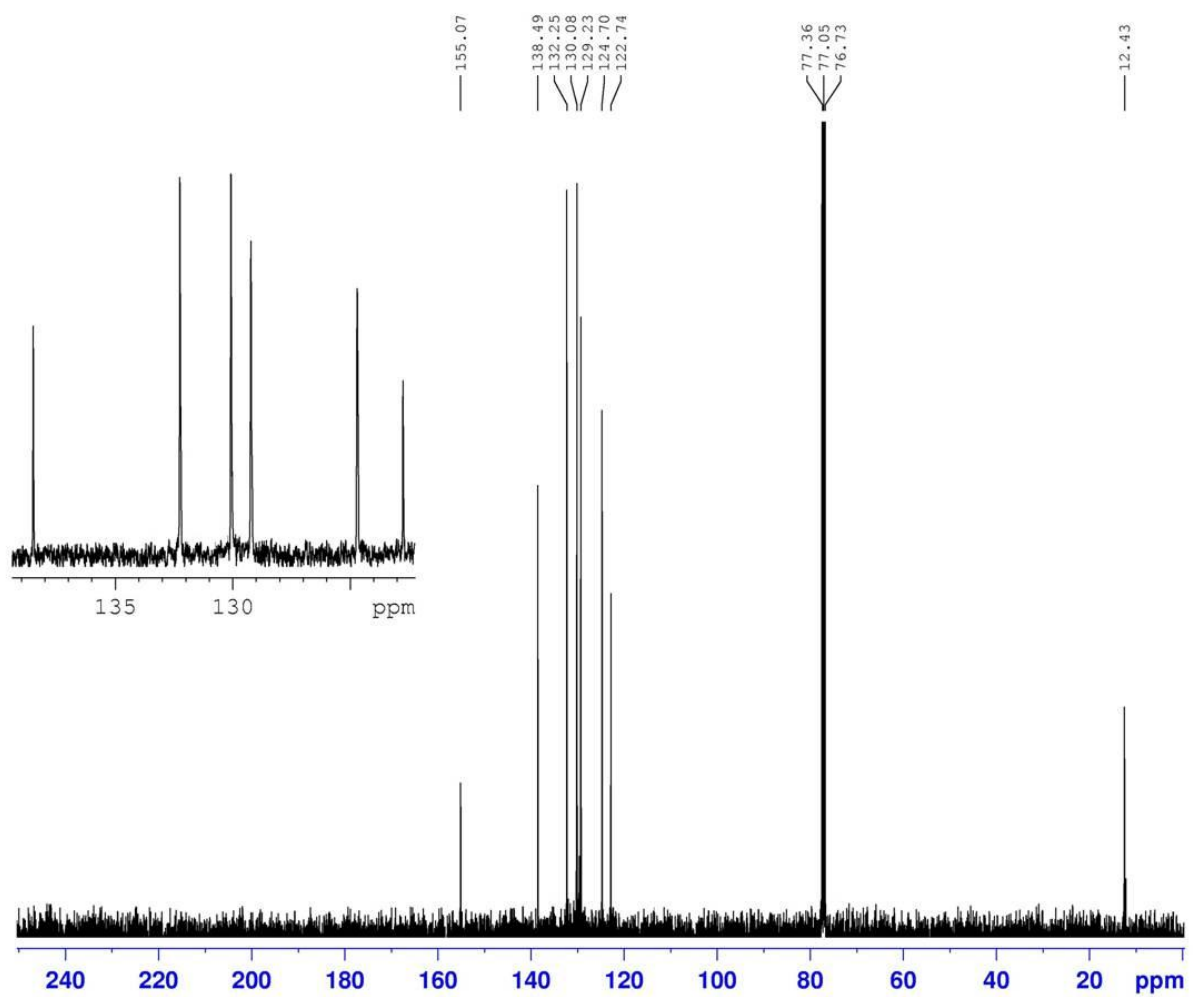



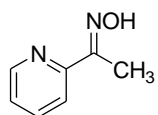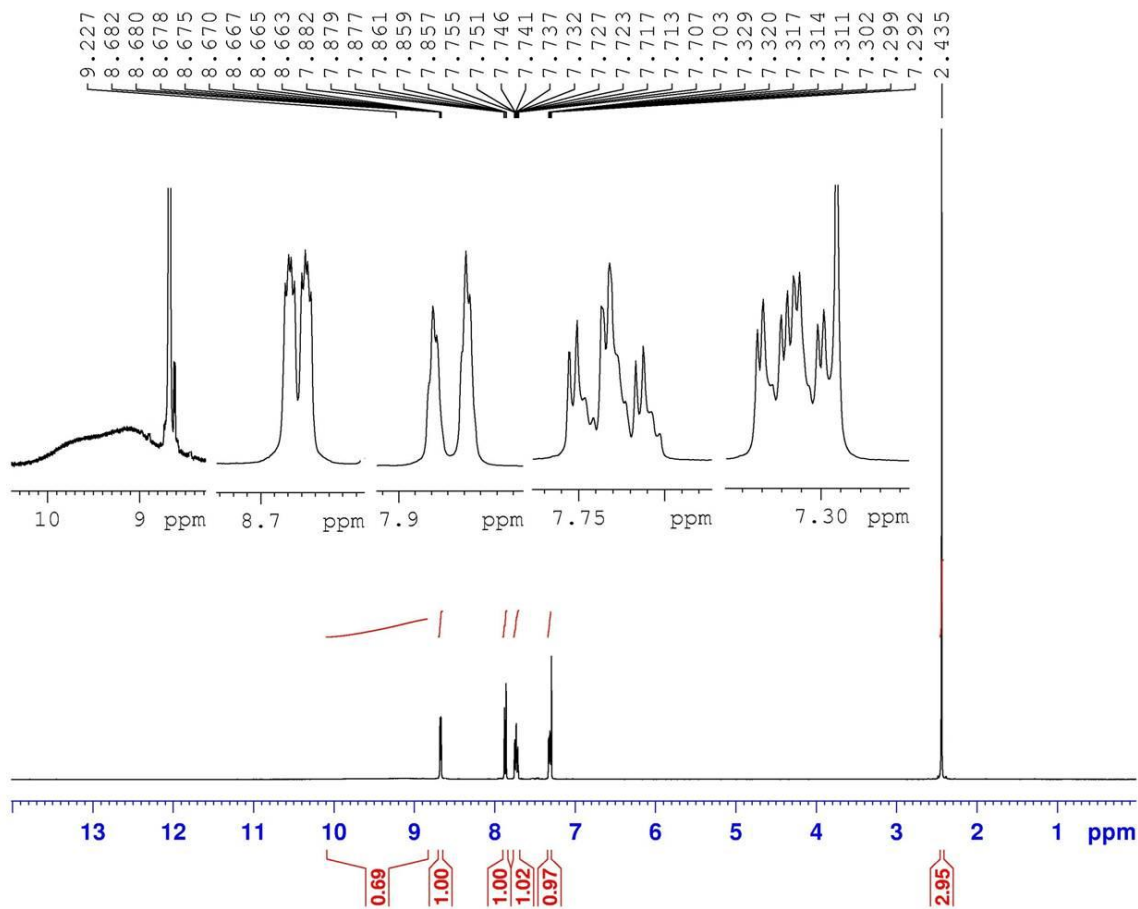

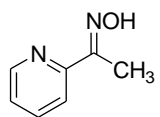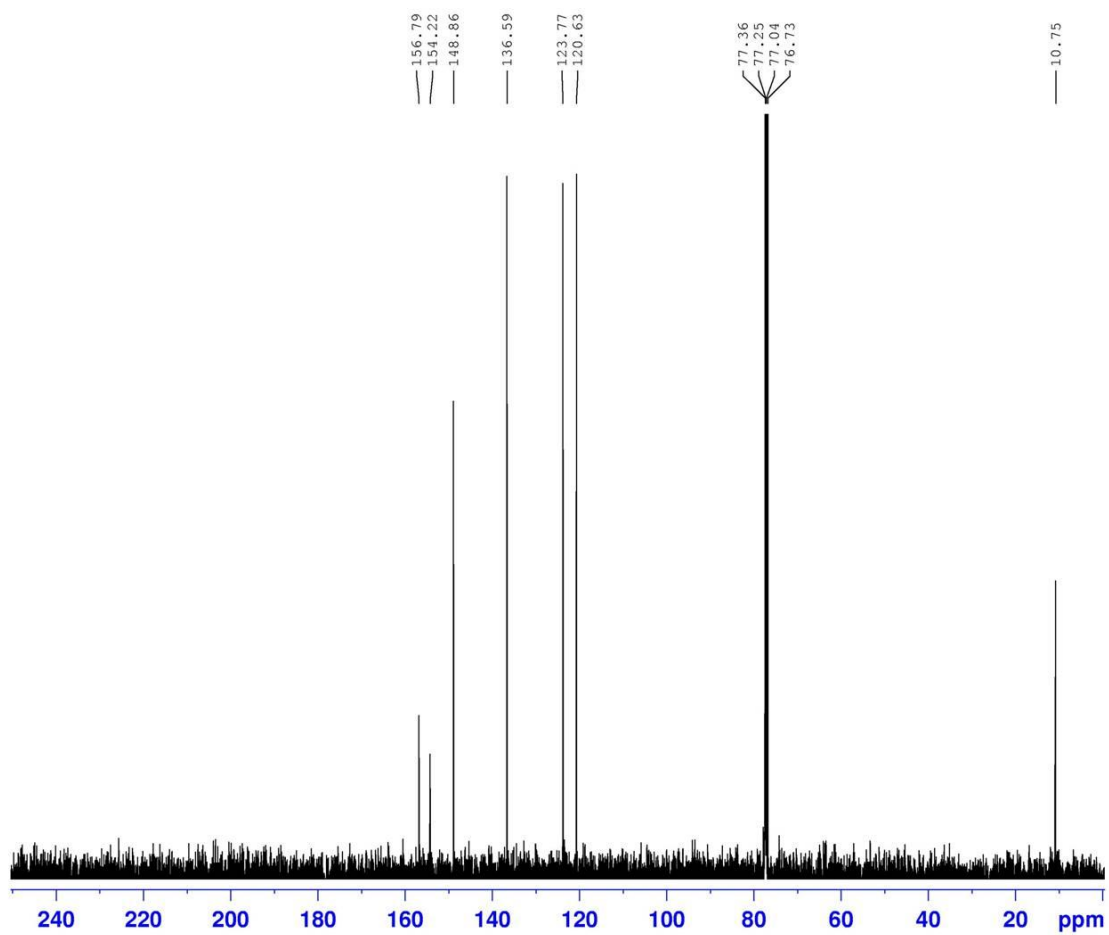

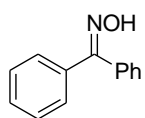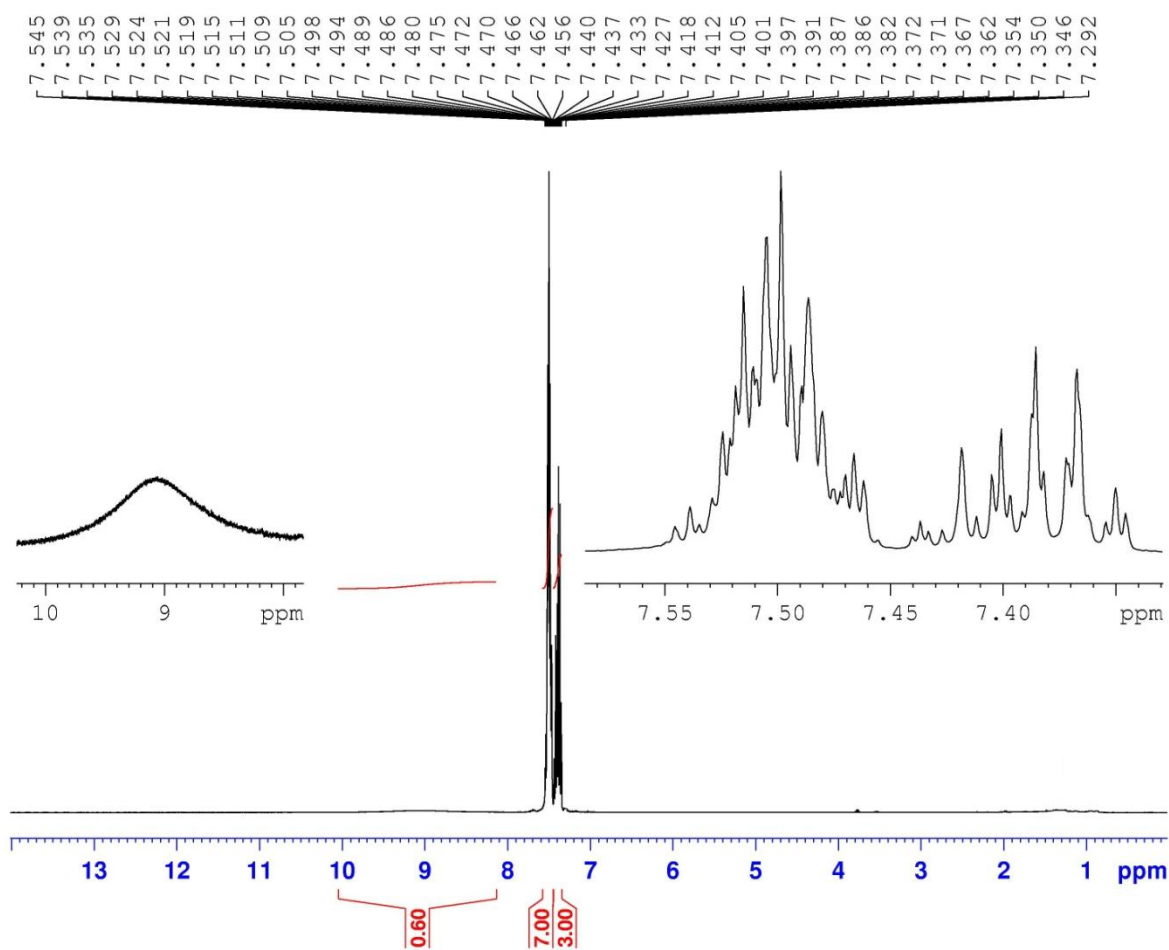

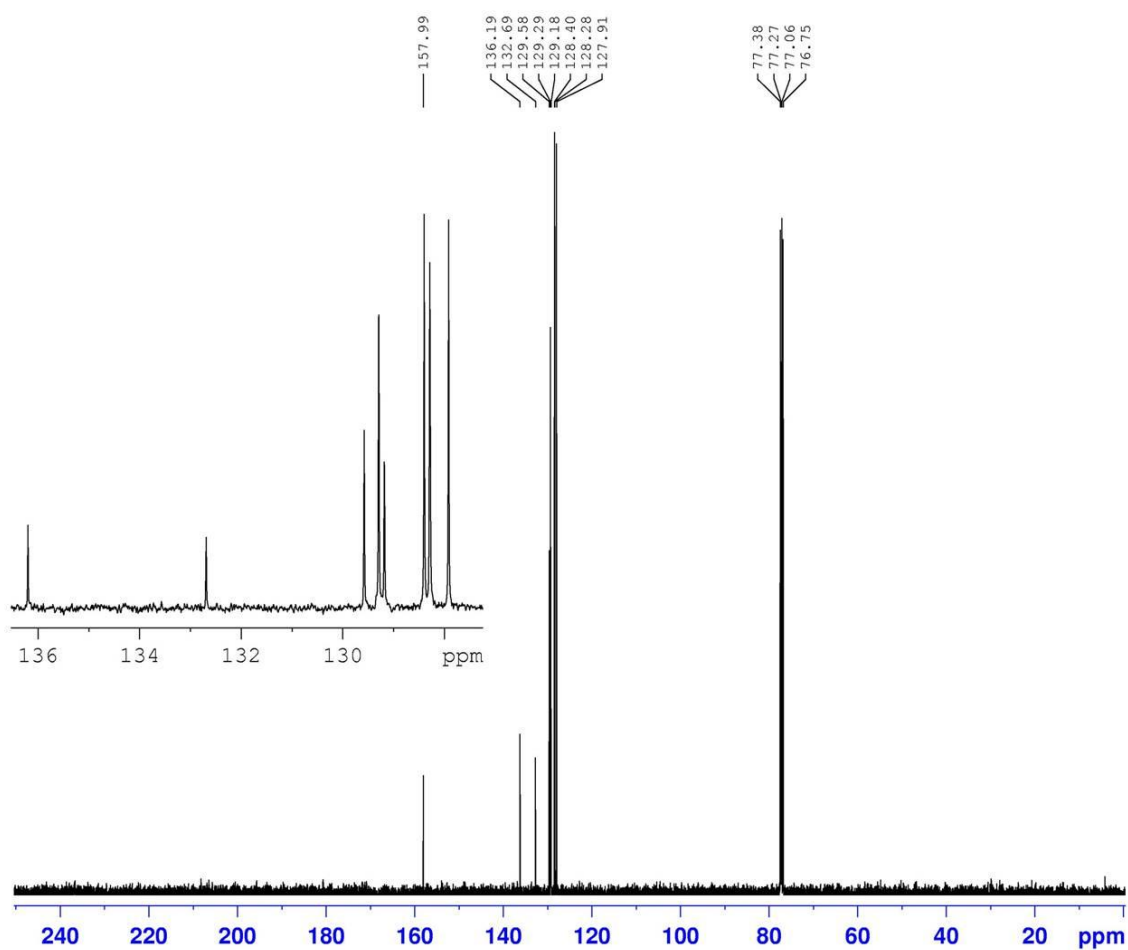

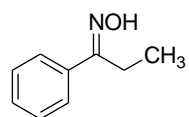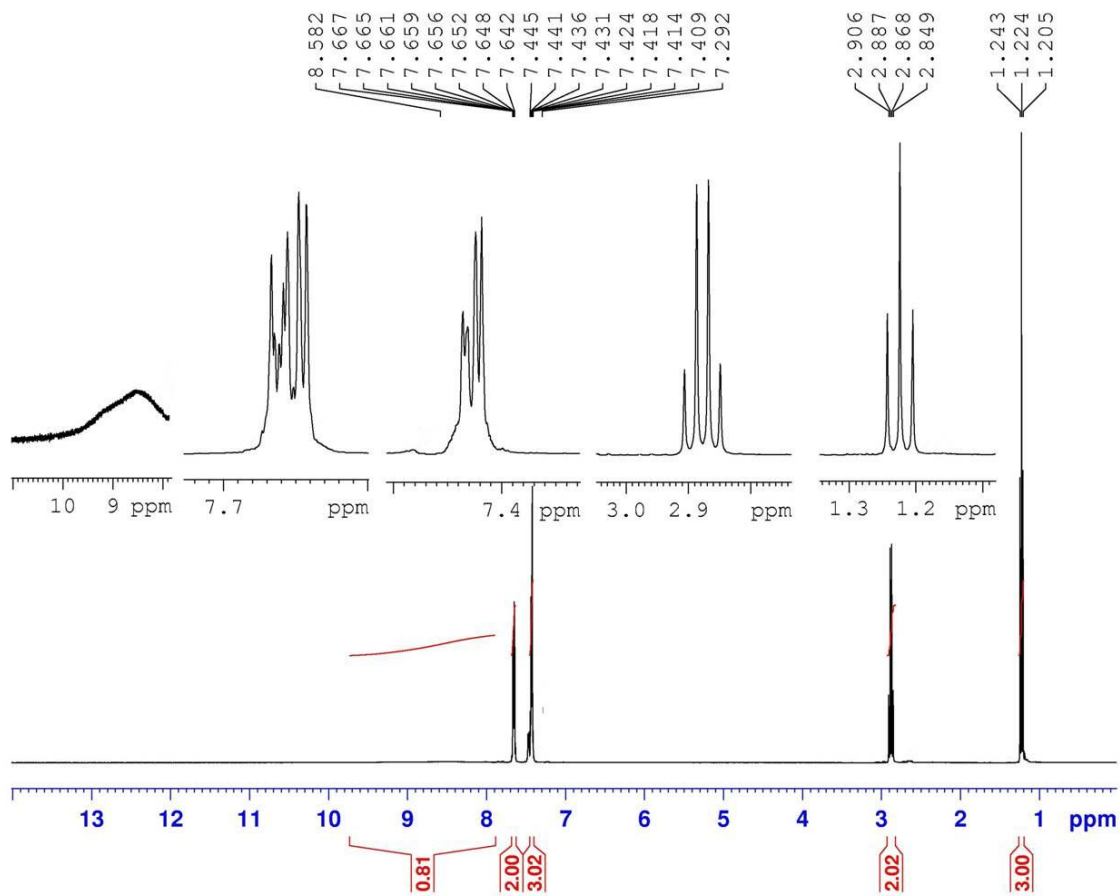

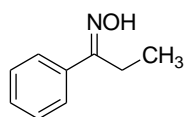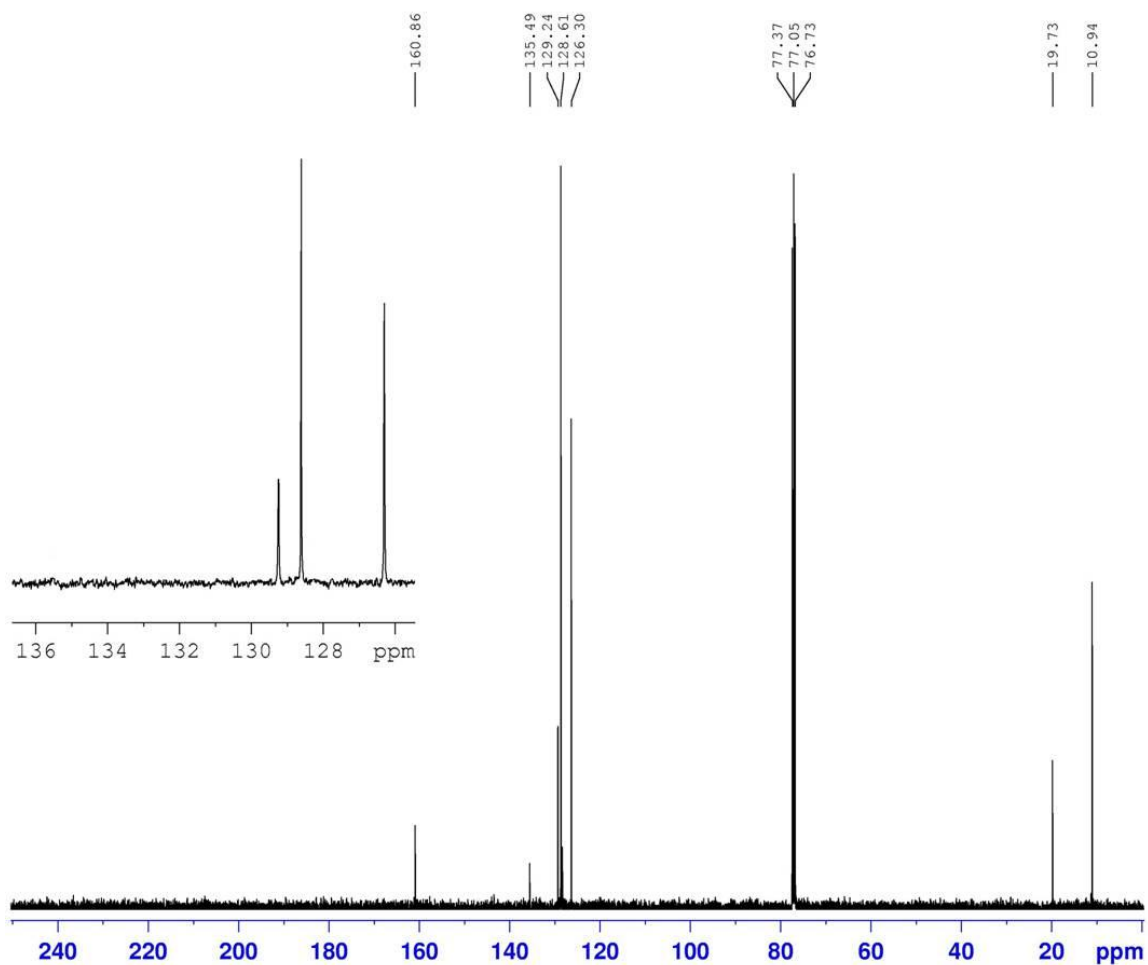

Supplement: c4nj01536c1.pdf [file c4nj01536c1.pdf]
